# Supplementary material for: Enhancement of anammox performance in a novel non-woven fabric membrane bioreactor (nMBR)
Source: Royal Society of Chemistry journal article supplement (doi:10.1039/c5ra16802c), 2015-01-01
Supplement: c5ra16802c1.pdf [file c5ra16802c1.pdf]

Supporting information for

**Enhancement of anammox performance in a novel non-woven fabric  
membrane bioreactor (nMBR)**

Long-Fei Ren<sup>a</sup>, Shuang Liang<sup>a</sup>, Huu Hao Ngo<sup>b</sup>, Wenshan Guo<sup>b</sup>, Shou-Qing Ni<sup>a,\*</sup>, Cui  
Liu<sup>c</sup>, Yuan-Kun Zhao<sup>a,d</sup>, Daisuke Hira<sup>e</sup>

<sup>a</sup> *Shandong Provincial Key Laboratory of Water Pollution Control and Resource  
Reuse, School of Environmental Science and Engineering, Shandong University, No.  
27 Shanda South Road, Jinan 250100, Shandong, PR China.*

<sup>b</sup> *Centre for Technology in Water and Wastewater, School of Civil and  
Environmental Engineering, University of Technology Sydney, Sydney, NSW 2007,  
Australia.*

<sup>c</sup> *Department of Mathematics and Statistics, Texas Tech University, Broadway and  
Boston, Lubbock, TX 79409-1042, USA.*

<sup>d</sup> *School of Civil and Environmental Engineering, Georgia Institute of Technology,  
North Ave NW, Atlanta, GA 30332, USA.*

<sup>e</sup> *Department of Applied Life Science, Faculty of Biotechnology and Life Science, Sojo  
University, 4-22-1 Ikeda, Kumamoto 860-0082, Japan.*

<sup>\*</sup> *Corresponding author: Shou-Qing Ni, School of Environmental Science and  
Engineering, Shandong University, Jinan, Shandong, PR China, 250100. E-mail:  
sqni@sdu.edu.cn*

Number of figures: 4

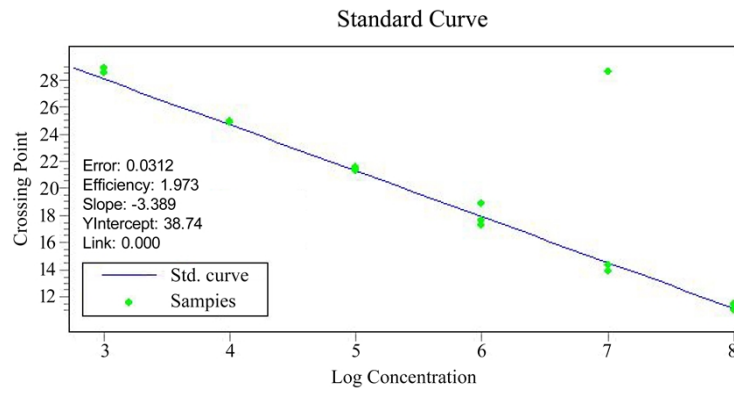

**Fig. S1.** The standard curves of anammox bacteria.

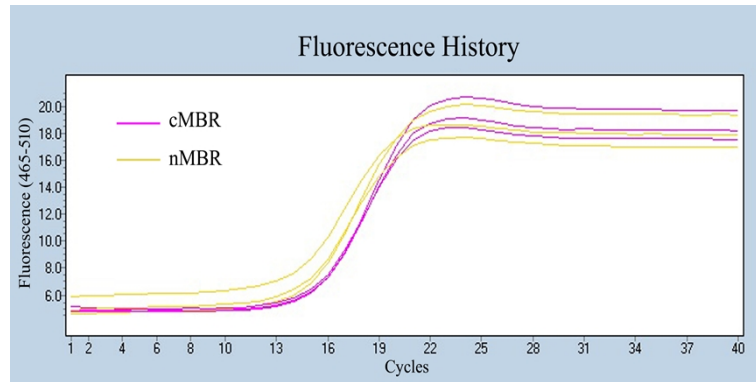

**Fig. S2. (a)** The amplification curves of cMBR and nMBR on day 60.

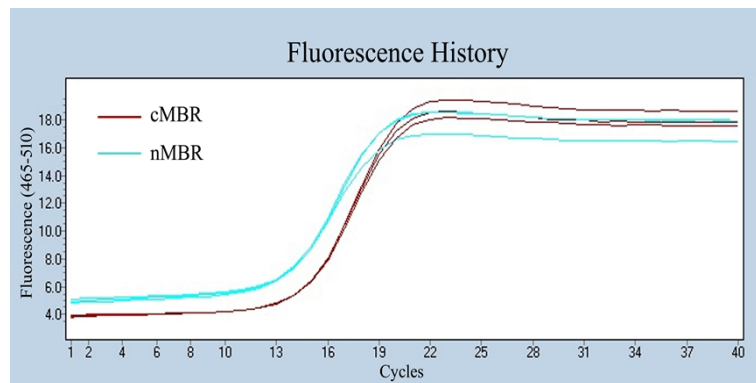

**Fig. S2. (b)** The amplification curves of cMBR and nMBR on day 120.

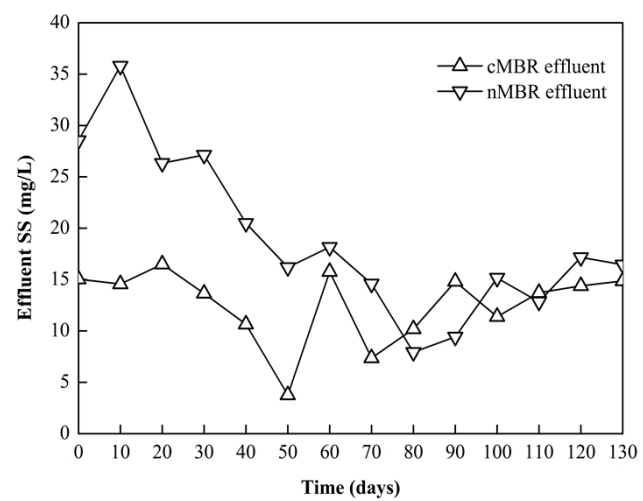

**Fig. S3.** The effluent SS of cMBR and nMBR during 120-day operation.

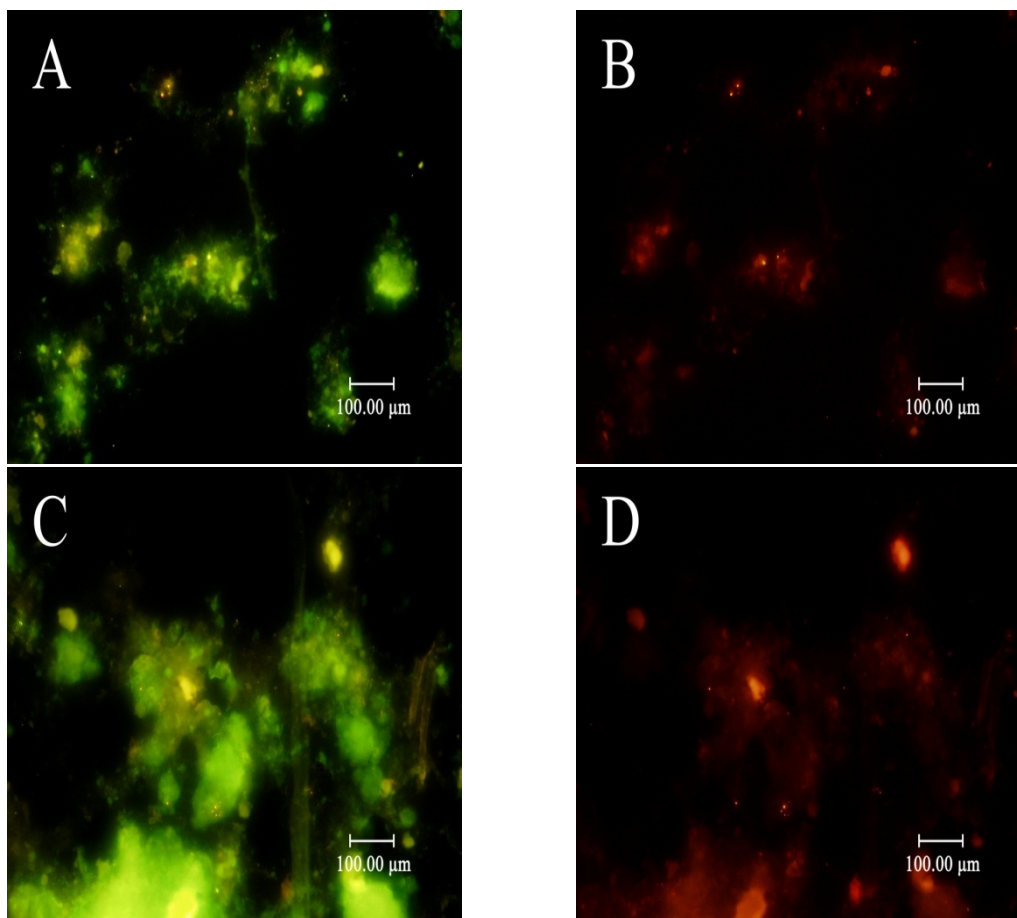

**Fig. S4.** (a) FISH image of total cells in an aggregate of cMBR on day 120; (b) FISH image of anammox bacteria in the same aggregate of cMBR on day 120; (c) FISH image of total cells in an aggregate of nMBR on day 120; (d) FISH image of anammox bacteria in the same aggregate of nMBR on day 120.
